# Supplementary material for: Cryo-EM structure of Mycobacterium smegmatis DyP-loaded encapsulin
Source: PubMed Central journal article supplement — Proc Natl Acad Sci U S A. 2021 Apr 14;118(16):e2025658118. doi: 10.1073/pnas.2025658118 (PMC8072242; doi:10.1073/pnas.2025658118), 2021-04-14
Supplement: pnas.2025658118.sapp.pdf [file pnas.2025658118.sapp.pdf]

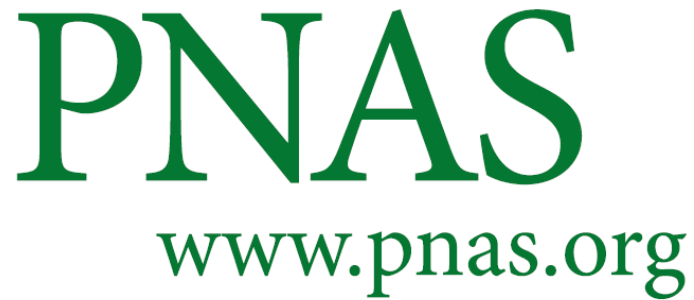

## **Supplementary Information for**

Cryo-EM structure of *Mycobacterium smegmatis* DyP-loaded encapsulin

Yanting Tang, An Mu, Yuying Zhang, Shan Zhou, Weiwei Wang, Yuezheng Lai, Xiaoting Zhou, Fengjiang Liu, Xiuna Yang, Hongri Gong, Quan Wang & Zihe Rao

Corresponding author: Hongri Gong and Quan Wang

Email: gonghr@nankai.edu.cn; wangq@ibp.ac.cn.

### **This PDF file includes:**

Figures S1 to S4

Tables S1 to S3

Legend for Movie S1

SI References

### **Other supplementary materials for this manuscript include the following:**

Movie S1

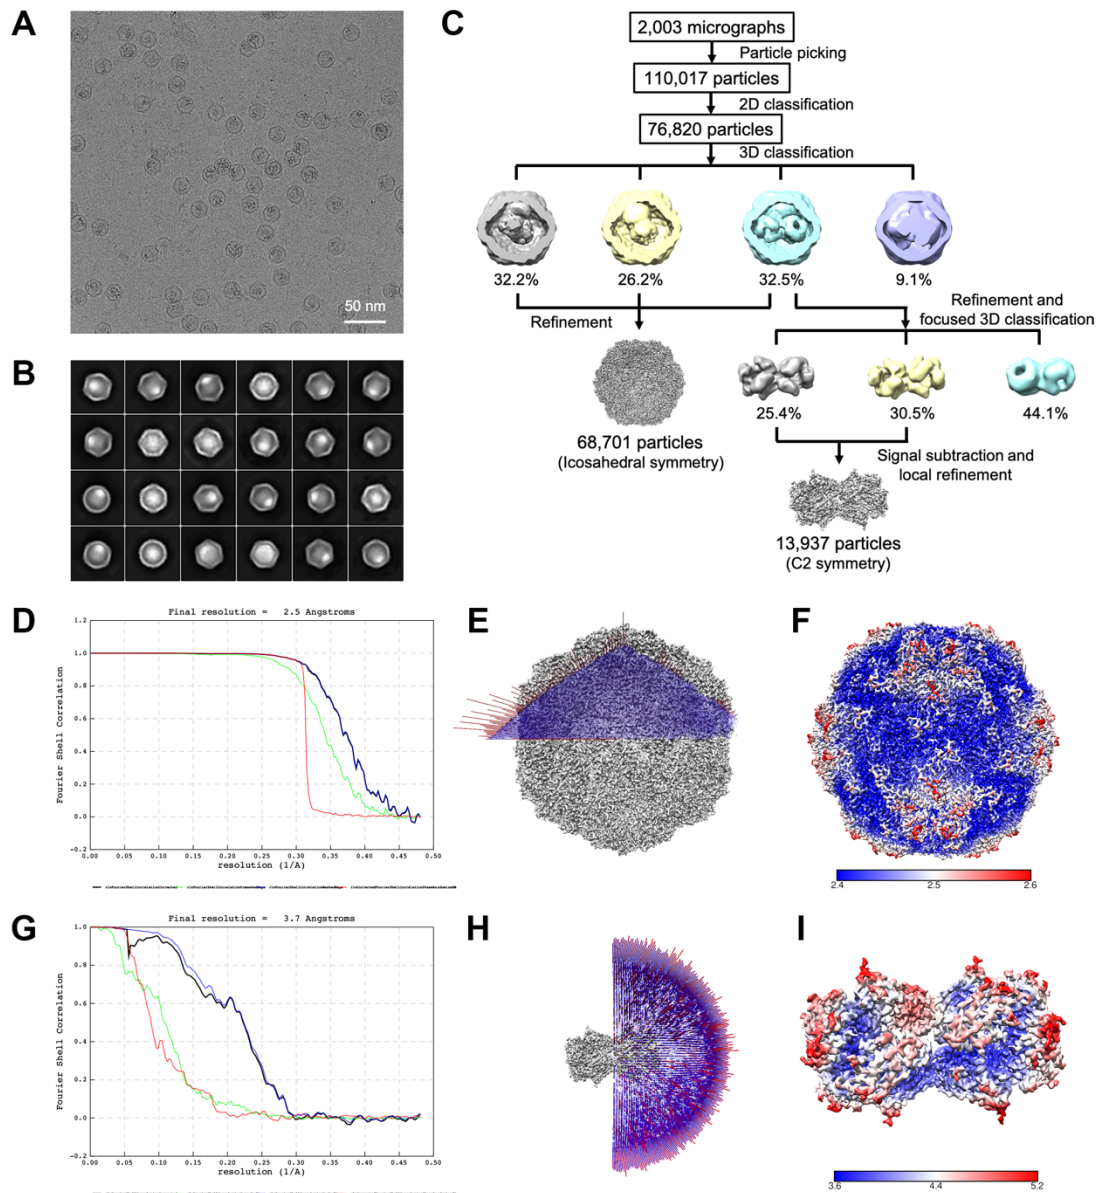

**Fig. S1. Image processing procedures and cryo-EM map quality assessment.** (A) Representative cryo-EM micrograph of *M. smegmatis* encapsulin. Scale bars: 50 nm. (B) 2D class averages of different views obtained from reference-free classification. (C) Overview of single-particle analysis workflow, from data collection to 3D reconstruction. The percentage of particles for each class are indicated. FSC curves of the final cryo-EM maps of the shell (D) and DyP (G). Euler angle distribution of all particles of the shell (E) and DyP (H). Local resolution of the density map of the shell (F) and DyP (I).

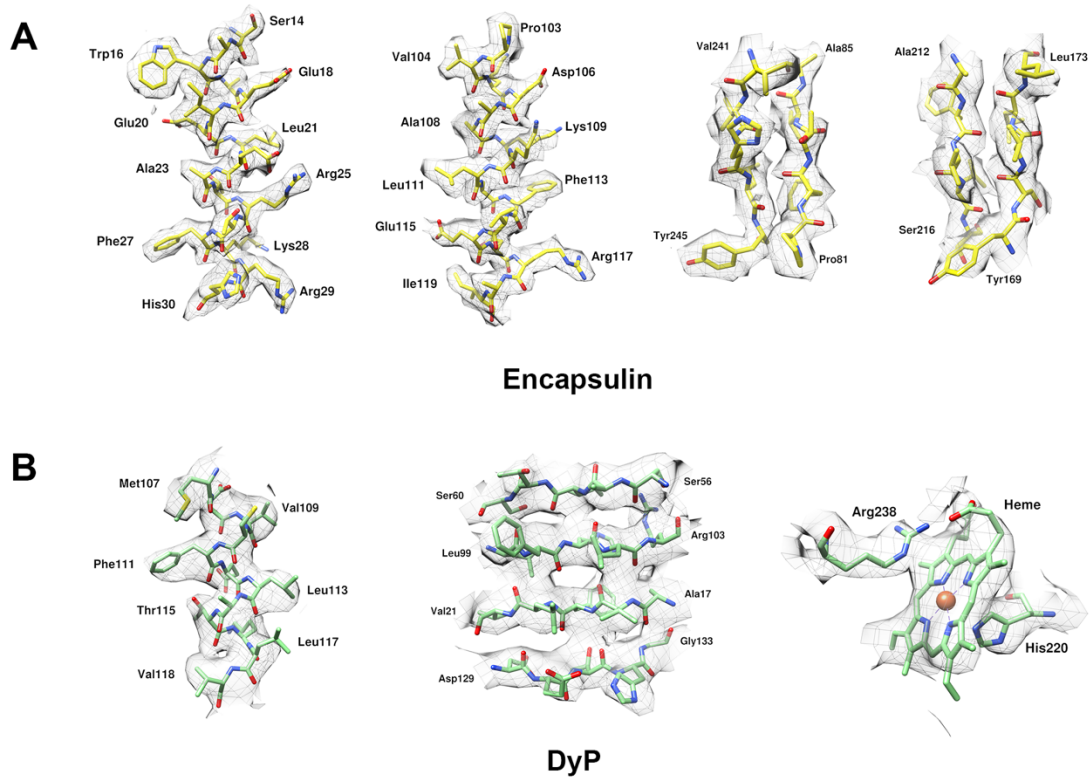

**Fig. S2. Cryo-EM densities of individual domains of the encapsulin shell and DyP.** (A) Representative cryo-EM densities of the shell monomer. (B) The cryo-EM densities of  $\alpha$ -helix (left),  $\beta$ -sheet (middle) and the heme prosthetic group (right) of DyP, with the distal Arg238 and the proximal His220.

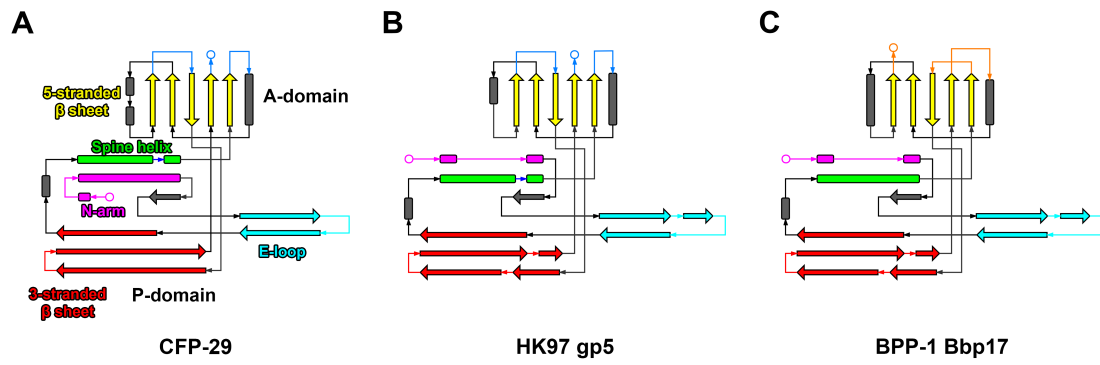

**Fig. S3. Topologies of encapsulin shell CFP-29 of *Mycobacterium smegmatis* (A), major capsid protein gp5 of *Enterobacteria phage HK97* (B) and major capsid protein Bbp17 of *Bordetella phage BPP-1* (C). Major structural elements are colored as indicated (N-arm, magenta; E-loop, cyan; 3-stranded  $\beta$  sheet, red; Spine helix, green; 5-stranded  $\beta$  sheet, yellow).**

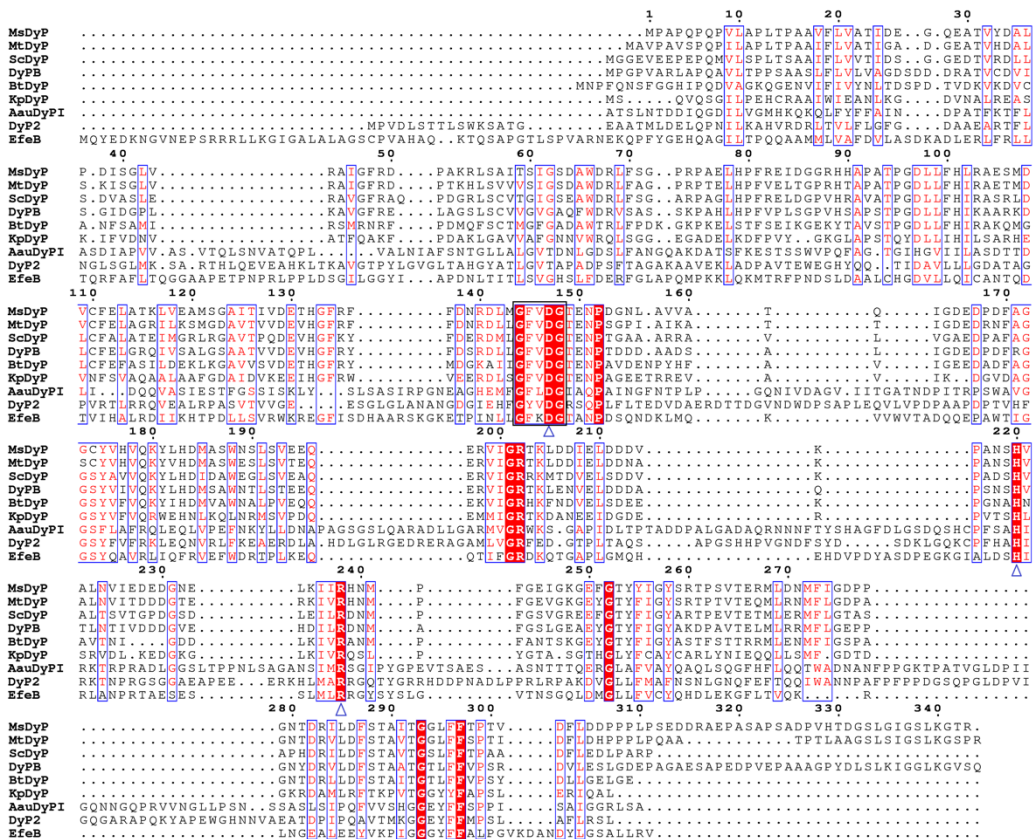

**Fig. S4. Multiple sequence alignments of DyP-type peroxidase family members.** The completely conserved residues are highlighted in red, and similar residues are displayed in red letters. The unique GXXDG motif is labeled with a black box. Triangles show the important residues around the heme active site. The proximal H220, the ligand for heme, forms the hydrogen-bond interaction with Asp282, and the distal Asp147-Arg238 couple plays an important role in catalytic activity. Sequence alignments were performed by Clustal Omega and ESPript. These sequences were obtained from UniProt, including MsDyP from *Mycobacterium smegmatis* (Accession No. A0R4G9), MtDyP from *Mycobacterium tuberculosis* (Accession No. A0A045KD97), DyPB from *Rhodococcus jostii* RHA1 (Accession No. Q0SE24), ScDyP from *Streptomyces coelicolor* (Accession No. Q9FBY9), BtDyP from *Bacteroides thetaiotaomicron* (Accession No. Q8A8E8), KpDyP from *Klebsiella pneumoniae* (Accession No. A0A0W8ATM9), AuuDyPI from *Auricularia auricula-judae* (Accession No. I2DBY1), DyP2 from *Amycolatopsis* sp. 75iv2 (Accession No. K7N5M8) and EfeB from *Escherichia coli* O157 (Accession No. Q8XAS4).

**Table S1. The resolution of the structures of all known cargo-encapsulated encapsulins.**

| <b>Organism</b>                     | <b>Method</b>     | <b>Global resolution (Å)</b>      | <b>Cargo protein</b> | <b>Cargo model built (%)</b> | <b>Reference</b> |
|-------------------------------------|-------------------|-----------------------------------|----------------------|------------------------------|------------------|
| <i>Thermotoga maritima</i>          | X-ray             | 3.1                               | Flp                  | 7.0                          | (1)              |
| <i>Myxococcus xanthus</i>           | Cryo-EM           | 25                                | Flp                  | 0                            | (2)              |
| <i>Brevibacterium linens</i>        | Cryo-EM           | 15.1                              | DyP                  | 0                            | (3)              |
| <i>Brevibacterium linens</i>        | Cryo-EM           | 24.7                              | DyP                  | 0                            |                  |
| <i>Brevibacterium linens</i>        | Cryo-EM           | 28.3                              | DyP                  | 0                            |                  |
| <i>Brevibacterium linens</i>        | Cryo-EM           | 24.2                              | TFP                  | 0                            |                  |
| <i>Brevibacterium linens</i>        | Cryo-EM           | 13.5                              | TFP                  | 0                            |                  |
| <i>Myxococcus xanthus</i>           | Cryo-ET           | 19.6                              | Flp                  | 0                            | (4)              |
| <i>Myxococcus xanthus</i>           | Cryo-ET           | 33                                | Flp                  | 0                            |                  |
| <i>Quasibacillus thermotolerans</i> | Cryo-EM           | 3.85                              | IMEF                 | 3.6                          | (5)              |
| <i>Synechococcus elongatus</i>      | Cryo-EM           | 2.2                               | CyD                  | 0                            | (6)              |
| <i>Thermotoga maritima</i>          | Cryo-EM           | 2.86                              | IDM                  | 0                            | (7)              |
| <i>Mycobacterium smegmatis</i>      | Negative stain EM | 27                                | DyP                  | 0                            | (8)              |
| <i>Mycobacterium smegmatis</i>      | Cryo-EM           | 4.1<br>2.5 (shell)<br>3.7 (cargo) | DyP                  | 90.1                         | This study       |

**Table S2. Identification of the nanocompartment components by peptide mass fingerprint spectroscopy.**

| Subunits                   |                        |                                    | Mass Spectroscopy         |                            |
|----------------------------|------------------------|------------------------------------|---------------------------|----------------------------|
| Accession /Gene Locus      | Protein Description    | Theoretical Molecular Weight (kDa) | Number of unique peptides | Percent sequence coverage% |
| WP_003897233.1 /MSMEG_5830 | 29 kDa antigen, CFP-29 | 28.7                               | 17                        | 70.94                      |
| WP_011730829.1 /MSMEG_5829 | DyP-type peroxidase    | 37.2                               | 14                        | 57.14                      |

**Table S3. Cryo-EM data collection, refinement and validation statistics.**

|                                                     | <b>Encapsulin shell</b> | <b>Encapsulated DyP-type peroxidase</b> | <b>Cargo-loaded encapsulin</b> |
|-----------------------------------------------------|-------------------------|-----------------------------------------|--------------------------------|
| <b>PDB entry</b>                                    | 7BOJ                    | 7BOK                                    | N/A                            |
| <b>EMDB entry</b>                                   | EMD-30130               | EMD-30131                               | EMD-30132                      |
| <b>Data collection</b>                              |                         |                                         |                                |
| Microscope                                          | Titan Krios             | Titan Krios                             | Titan Krios                    |
| Voltage (kV)                                        | 300                     | 300                                     | 300                            |
| Magnification                                       | 130,000x                | 130,000x                                | 130,000x                       |
| Detector                                            | Gatan GIF-K2            | Gatan GIF-K2                            | Gatan GIF-K2                   |
| Data collection software                            | SerialEM                | SerialEM                                | SerialEM                       |
| Electron exposure (e <sup>-</sup> /Å <sup>2</sup> ) | 60                      | 60                                      | 60                             |
| Defocus range (μm)                                  | 1.5-2.5                 | 1.5-2.5                                 | 1.5-2.5                        |
| Pixel size (Å)                                      | 1.04                    | 1.04                                    | 1.04                           |
| <b>Data processing</b>                              |                         |                                         |                                |
| Number of micrographs (no.)                         | 2,003                   | 2,003                                   | 2,003                          |
| Final particle images (no.)                         | 68,701                  | 13,937                                  | 25,020                         |
| Symmetry imposed                                    | 11                      | C2                                      | C1                             |
| Map resolution (Å)                                  |                         |                                         |                                |
| FSC threshold 0.143                                 | 2.5                     | 3.7                                     | 4.1                            |
| <b>Refinement</b>                                   |                         |                                         |                                |
| Initial model used (PDB code)                       | 3DKT                    | 4GU7                                    | N/A                            |
| Model resolution (Å)                                |                         |                                         |                                |
| FSC threshold 0.143                                 | 2.4                     | 3.6                                     | N/A                            |
| Map sharpening B factor (Å <sup>2</sup> )           | -91.54                  | -70.94                                  | N/A                            |
| Map correlation coefficient                         |                         |                                         |                                |
| CC (mask)                                           | 0.86                    | 0.82                                    | N/A                            |
| CC (box)                                            | 0.42                    | 0.75                                    | N/A                            |
| CC (peaks)                                          | 0.24                    | 0.66                                    | N/A                            |
| CC (volume)                                         | 0.75                    | 0.81                                    | N/A                            |
| Mean CC for ligands                                 | N/A                     | 0.87                                    | N/A                            |
| Model composition                                   |                         |                                         |                                |
| Non-hydrogen atoms                                  | 2,025                   | 14,562                                  | N/A                            |
| Protein residues                                    | 265                     | 1,854                                   | N/A                            |
| Ligands                                             | 0                       | 6 (HEM)                                 | N/A                            |
| <i>B</i> factors (Å <sup>2</sup> )                  |                         |                                         |                                |
| Protein                                             | 18.20                   | 79.95                                   | N/A                            |
| Ligand                                              | N/A                     | 74.07                                   | N/A                            |
| R.M.S. deviations                                   |                         |                                         |                                |
| Bond lengths (Å)                                    | 0.007                   | 0.006                                   | N/A                            |
| Bond angles (°)                                     | 0.904                   | 1.108                                   | N/A                            |
| Validation                                          |                         |                                         |                                |
| MolProbity score                                    | 1.09                    | 1.77                                    | N/A                            |
| Clashscore                                          | 2.49                    | 8.38                                    | N/A                            |
| Poor rotamers (%)                                   | 0                       | 0                                       | N/A                            |
| Ramachandran plot                                   |                         |                                         |                                |
| Favored (%)                                         | 97.72                   | 95.39                                   | N/A                            |
| Allowed (%)                                         | 2.28                    | 4.61                                    | N/A                            |
| Disallowed (%)                                      | 0                       | 0                                       | N/A                            |
| Cβ outliers (%)                                     | 0                       | 0                                       | N/A                            |
| Peptide plane (%)                                   |                         |                                         |                                |
| Cis proline/general                                 | 0.0/0.0                 | 0.0/0.0                                 | N/A                            |
| Twisted proline/general                             | 0.0/0.0                 | 0.0/0.0                                 | N/A                            |
| CaBLAM outliers (%)                                 | 0.77                    | 1.69                                    | N/A                            |



**Movie S1. The cryo-EM density maps of the DyP and encapsulin shell.** Structural analysis was performed using the multi-body refinement in RELION. The relative motion between DyP and encapsulin shell is described based on the first component of the PCA analysis.

## SI References

1. M. Sutter *et al.*, Structural basis of enzyme encapsulation into a bacterial nanocompartment. *Nat. Struct. Mol. Biol.* **15**, 939-947 (2008).
2. C. A. McHugh *et al.*, A virus capsid-like nanocompartment that stores iron and protects bacteria from oxidative stress. *EMBO J.* **33**, 1896-1911 (2014).
3. R. M. Putri *et al.*, Structural characterization of native and modified encapsulins as nanoplatforms for in vitro catalysis and cellular uptake. *ACS Nano* **11**, 12796-12804 (2017).
4. F. Sigmund *et al.*, Bacterial encapsulins as orthogonal compartments for mammalian cell engineering. *Nat. Commun.* **9**, 1990 (2018).
5. T. W. Giessen *et al.*, Large protein organelles form a new iron sequestration system with high storage capacity. *eLife* **8**, e46070 (2019).
6. R. J. Nichols *et al.*, Discovery and characterization of a novel family of prokaryotic nanocompartments involved in sulfur metabolism. *bioRxiv* [preprint] (2020). 10.1101/2020.05.24.113720.
7. X. Xiong *et al.*, Cryo-EM structure of heterologous protein complex loaded *Thermotoga maritima* encapsulin capsid. *Biomolecules* **10**, 1342 (2020).
8. A. M. Kirykowicz, J. D. Woodward, Shotgun EM of mycobacterial protein complexes during stationary phase stress. *Curr. Res. Struct. Biol.* **2**, 204-212 (2020).
